# Supplementary material for: Differential gene sets profiling in gram-negative and gram-positive sepsis
Source: Research Square preprint supplement (doi:10.21203/rs.3.rs-373850/v1), 2021-04-05
Supplement: Supplementary file 1 [file 9d4d1d79c0498e84232c3de7.docx]

**Table S1** The top ten representative differential gene sets between different infections based on GSVA.

| Gram-negative vs mixed sepsis | p value |
| --- | --- |
| GSE3039_NKT_CELL_VS_ALPHAALPHA_CD8_TCELL_DN | 0.0009 |
| HOUSTIS_ROS | 0.0009 |
| BOYAULT_LIVER_CANCER_SUBCLASS_G123_DN | 0.0009 |
| NOUSHMEHR_GBM_SOMATIC_MUTATED | 0.0009 |
| GSE20366_TREG_VS_TCONV_DN | 0.001 |
| GSE3982_MAST_CELL_VS_NEUTROPHIL_UP | 0.001 |
| GSE3920_IFNA_VS_IFNB_TREATED_ENDOTHELIAL_CELL_UP | 0.001 |
| GSE21033_3H_VS_12H_POLYIC_STIM_DC_DN | 0.001 |
| DUTTA_APOPTOSIS_VIA_NFKB | 0.001 |
| HERNANDEZ_MITOTIC_ARREST_BY_DOCETAXEL_2_DN | 0.001 |
| Gram- positive vs mixed sepsis | p value |
| HALLMARK_ALLOGRAFT_REJECTION) | 0.0009 |
| GSE15659_RESTING_TREG_VS_NONSUPPRESSIVE_TCELL_DN) | 0.0009 |
| GSE15930_STIM_VS_STIM_AND_IL12_48H_CD8_T_CELL_DN) | 0.0009 |
| GSE2706_2H_VS_8H_LPS_STIM_DC_DN) | 0.0009 |
| GSE39820_CTRL_VS_TGFBETA1_IL6_IL23A_CD4_TCELL_DN) | 0.0009 |
| GSE22601_DOUBLE_NEGATIVE_VS_IMMATURE_CD4_SP_THYMOCYTE_UP) | 0.0009 |
| GSE4590_PRE_BCELL_VS_LARGE_PRE_BCELL_UP) | 0.0009 |
| GSE13522_CTRL_VS_T_CRUZI_Y_STRAIN_INF_SKIN_129_MOUSE_UP) | 0.0009 |
| MIKKELSEN_ES_LCP_WITH_H3K4ME3) | 0.0009 |
| NOUSHMEHR_GBM_SOMATIC_MUTATED) | 0.0009 |
| Gram-negative vs Gram- positive sepsis | p value |
| GSE4590_PRE_BCELL_VS_LARGE_PRE_BCELL_UP | 0.0009 |
| GSE22935_24H_VS_48H_MBOVIS_BCG_STIM_MACROPHAGE_DN | 0.0009 |
| GSE32901_TH17_EMRICHED_VS_TH17_NEG_CD4_TCELL_UP | 0.0009 |
| KEGG_FOLATE_BIOSYNTHESIS | 0.0009 |
| REACTOME_ORGANIC_ANION_TRANSPORT | 0.0009 |
| GSE17721_CPG_VS_GARDIQUIMOD_16H_BMDC_UP | 0.001 |
| GSE5589_WT_VS_IL10_KO_LPS_STIM_MACROPHAGE_180MIN_DN | 0.001 |
| GSE26488_WT_VS_VP16_TRANSGENIC_HDAC7_KO_DOUBLE_POSITIVE_THYMOCYTE_DN | 0.001 |
| GSE37301_CD4_TCELL_VS_RAG2_KO_NK_CELL_DN | 0.001 |
| BLANCO_MELO_COVID19_SARS_COV_2_INFECTION_A594_ACE2_EXPRESSING_CELLS_DN | 0.001 |
